# Supplementary material
Source: publisher site journal article supplement (https://www.dovepress.com/article/116091)
Supplement: Supplementary file 1 [file get_supplementary_file.php]

Supplementary material: Equivalent dosage ratios of breakthrough pain substances to oral morphine, sorted by potency (po: oral, iv: intravenous; sc: subcutaneous; subl: sublingual).

| <b>Active substance</b> | <b>Application form</b> | <b>Ratio substance :<br/>morphine oral</b> | <b>Reference</b>                                     |
|-------------------------|-------------------------|--------------------------------------------|------------------------------------------------------|
| Pethidine               | iv                      | 1 : 0.1                                    | Lucerne Cantonal Hospital                            |
| Tramadol                | po                      | 1 : 0.125                                  | Swissmedic                                           |
| Tapentadol              | po                      | 1 : 0.4                                    | Baden Cantonal Hospital                              |
| Morphine                | po                      | 1 (reference)                              | Basel University Hospital                            |
| Oxycodone               | po                      | 1 : 1.5                                    | Basel University Hospital                            |
| Morphine                | sc                      | 1 : 2                                      | Lucerne Cantonal Hospital                            |
| Morphine                | iv                      | 1 : 3                                      | Basel University Hospital; Lucerne Cantonal Hospital |
| Hydromorphone           | po                      | 1 : 5                                      | Basel University Hospital                            |
| Hydromorphone           | sc                      | 1 : 15                                     | University Hospital Hamburg-Eppendorf                |
| Buprenorphine           | subl                    | 1 : 100                                    | Basel University Hospital                            |
| Fentanyl                | subl                    | 1 : 150                                    | Baden Cantonal Hospital                              |

Baden: Lutters M. Äquivalenzen - zentral wirksame Analgetika. Kantonsspital Baden, 2014. Retrieved 03.04.2015, from [www.kantonsspitalbaden.ch/Departemente-Medizinische-Dienste/Dokumente/opiatanalgetika\\_aequivalenzen.pdf](http://www.kantonsspitalbaden.ch/Departemente-Medizinische-Dienste/Dokumente/opiatanalgetika_aequivalenzen.pdf)

Basel: Äquivalenzdosen von Opioiden bei Langzeitanwendung. Universitätsspital Basel, 2010. Retrieved 03.04.2015, from [www.spitalpharmazie-basel.ch/pdf/Aequivalenz\\_Opioide.pdf](http://www.spitalpharmazie-basel.ch/pdf/Aequivalenz_Opioide.pdf)

Hamburg-Eppendorf: Opioid-Umrechnungstabelle – Dauertherapie, 2011. Retrieved 03.04.2015, from [www.uke.de/kliniken/anaesthesiologie/downloads/klinik-anaesthesiologie/Kitteltasche\\_Opioidumrechnung\\_2011.pdf](http://www.uke.de/kliniken/anaesthesiologie/downloads/klinik-anaesthesiologie/Kitteltasche_Opioidumrechnung_2011.pdf)

Lucerne: Opiate Umrechnungstabelle. Palliativmedizin Luzern, 2013. Retrieved 03.04.2015, from [www.palliativ-luzern.ch/assets/pdf/Opiate\\_Umrechnung\\_1.3.13.pdf](http://www.palliativ-luzern.ch/assets/pdf/Opiate_Umrechnung_1.3.13.pdf)

Swissmedic: Summary of Product Characteristics of Tramadol-Mepha®. Retrieved 03.04.2015, from [www.swissmedicinfo.ch](http://www.swissmedicinfo.ch)
